# Supplementary material for: New Insights Into Biomphalysin Gene Family Diversification in the Vector Snail Biomphalaria glabrata
Source: PubMed Central journal article supplement (PMC8047071; doi:10.3389/fimmu.2021.635131), 2021-04-01

Biomphalysins 1 2 3 4 5 6 7 8 9 10 11 12 13 14 15 16 17 18 19 20 21 22 23

Biomphalysin 1  
Biomphalysin 2  
Biomphalysin 3  
Biomphalysin 4  
Biomphalysin 5  
Biomphalysin 6  
Biomphalysin 7  
Biomphalysin 8  
Biomphalysin 9  
Biomphalysin 10  
Biomphalysin 11  
Biomphalysin 12  
Biomphalysin 13  
Biomphalysin 14  
Biomphalysin 15  
Biomphalysin 16  
Biomphalysin 17  
Biomphalysin 18  
Biomphalysin 19  
Biomphalysin 20  
Biomphalysin 21  
Biomphalysin 22  
Biomphalysin 23

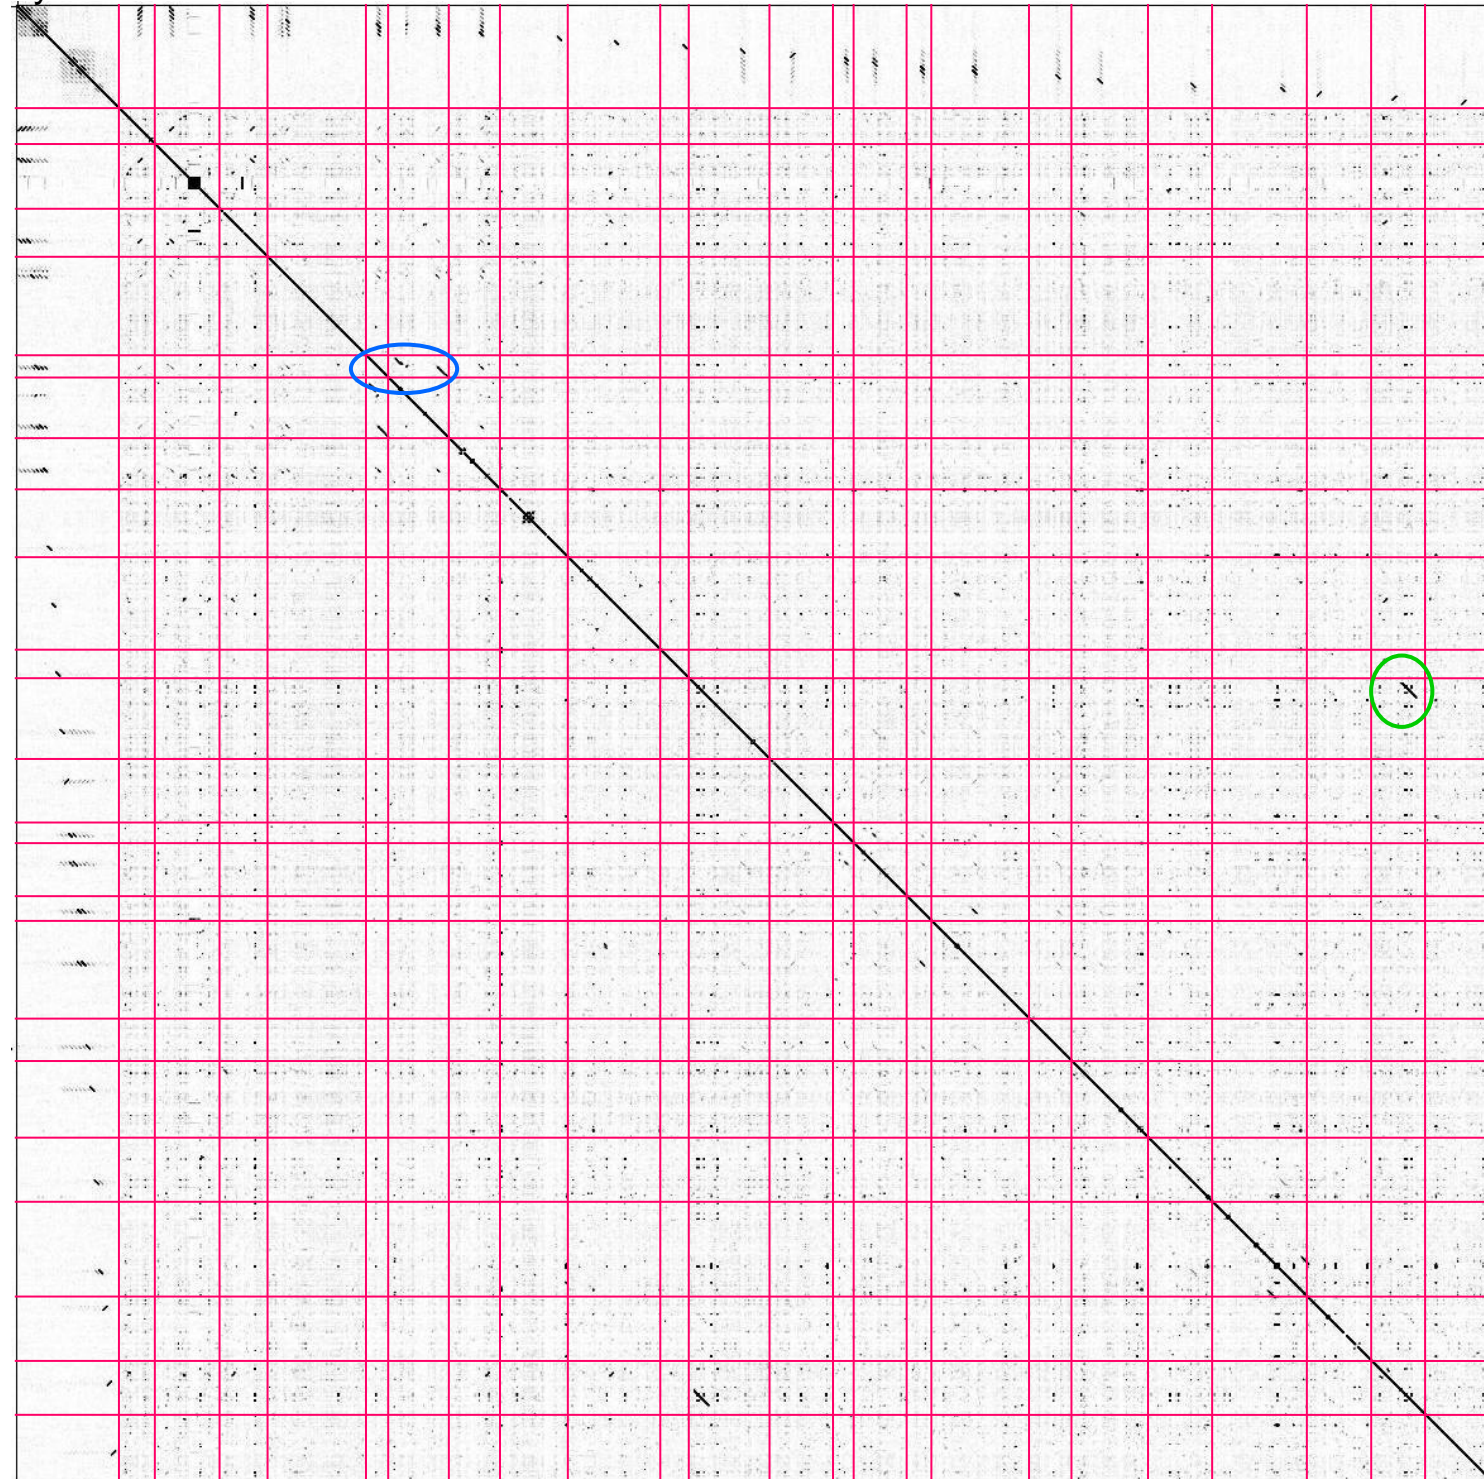

Supplement: Image_1.pdf [file Image_1.pdf]
