# Supplementary material for: New Insights Into Biomphalysin Gene Family Diversification in the Vector Snail Biomphalaria glabrata
Source: PubMed Central journal article supplement (PMC8047071; doi:10.3389/fimmu.2021.635131), 2021-04-01

A

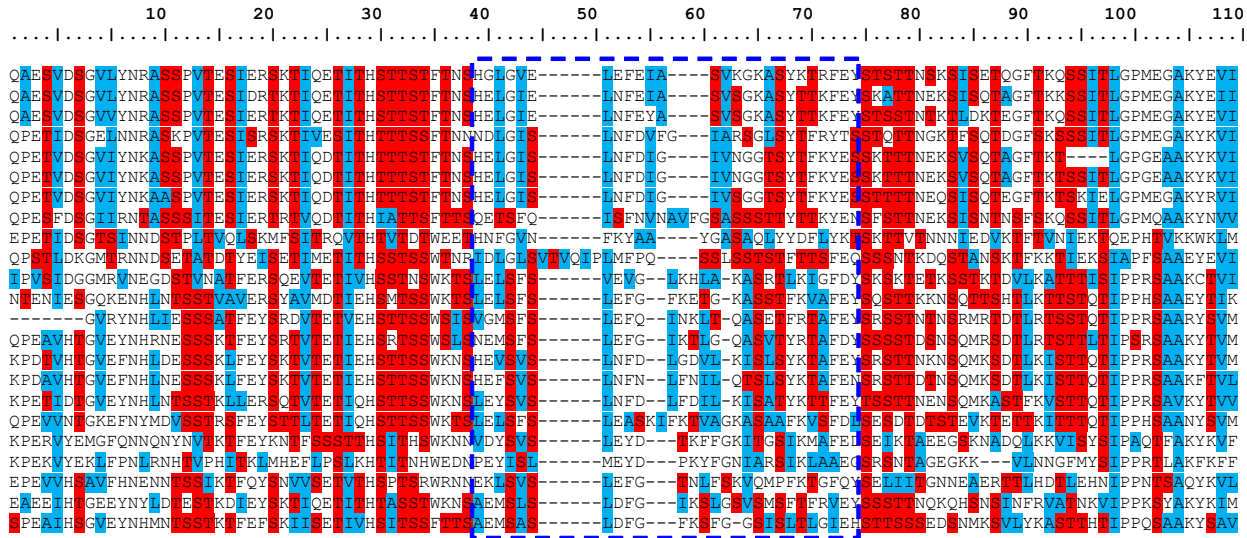

TMD

B

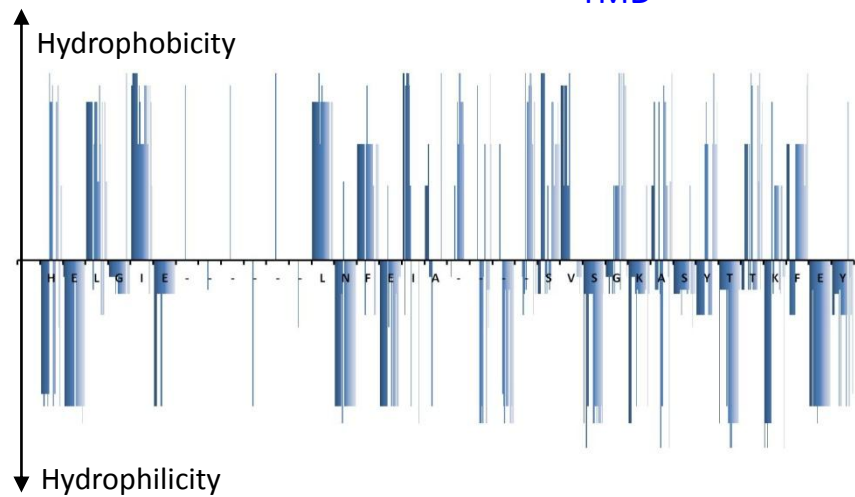

C

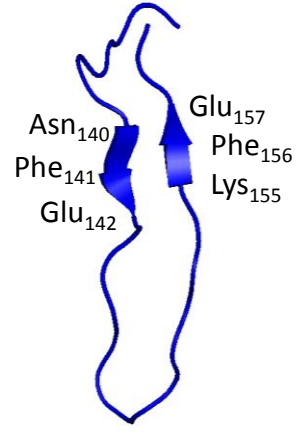

Supplement: Image_3.pdf [file Image_3.pdf]
