# Supplementary material for: New Insights Into Biomphalysin Gene Family Diversification in the Vector Snail Biomphalaria glabrata
Source: Front Immunol. 2021 Apr 1;12:635131. doi: 10.3389/fimmu.2021.635131 (PMC8047071; doi:10.3389/fimmu.2021.635131)
Supplement: Supplementary file 8 [file Table_4.xlsx]

## Sheet: Table S4
	Sequence similarity and identity between the biomphalysin proteins
	B1	B2	B3	B4	B5	B6	B7	B8	B9	B10	B11	B12	B13	B14	B15	B16	B17	B18	B19	B20	B21	B22	B23	Aerolysin
Biomphalysin 1	-	97.66	89.43	83.81	83.06	81.26	83.42	69.11	50.89	58.01	59.89	58.77	56.48	60.04	59.37	59.72	61.09	55.81	50.97	43.86	49.65	47.12	47.9	29
Biomphalysin 2	95.1	-	89.96	84.17	83.96	82.52	83.96	69.82	51.43	58.71	59.54	58.6	55.97	59.51	59.19	59.54	61.09	55.28	50.97	43.68	49.48	47.82	48.25	29.53
Biomphalysin 3	83.92	84.62	-	81.04	78.49	79.39	80.47	67.32	51.15	57.52	58.36	57.07	55.35	58.84	58.36	59.06	60.25	54.82	50.52	43.11	47.92	46.61	47.13	29.02
Biomphalysin 4	75.35	75.35	71.68	-	82.37	83.45	83.99	67.32	52.41	58.25	60.07	59.3	55.29	60.39	59.19	59.89	60.56	55.11	51.75	45.01	47.83	49.3	48.34	27.19
Biomphalysin 5	74.03	74.73	69.61	73.85	-	87.57	84.68	67.38	51.07	58.52	57.97	56.67	54.1	57.75	58.32	58.84	58.98	54.58	50.09	43.51	48.26	47.64	47.4	27.34
Biomphalysin 6	71.02	71.91	69.43	76.15	84.11	-	84.32	67.5	51.26	59.57	58.52	57.37	54.61	57.75	59.86	60.21	59.51	55.28	50.26	44.54	48.43	49.74	49.21	28.42
Biomphalysin 7	72.9	73.43	70.28	74.13	77.74	77.39	-	68.21	51.96	58.52	59.72	58.6	55.97	60.74	59.72	60.6	61.27	55.46	49.74	44.21	48.09	49.56	49.3	29
Biomphalysin 8	55.75	56.28	55.04	53.89	55.26	54.09	55.04	-	49.47	58.84	58.84	57.62	55.97	59.58	59.58	59.75	58.35	56.94	50.53	44.11	49.83	47.29	48.25	27.77
Biomphalysin 9	36.46	36.46	36.04	38.99	37.41	36.59	36.46	35.62	-	56.25	48.06	48.68	45.81	48.68	51.15	51.32	51.85	46.56	48.23	42.56	44.68	43.33	43.11	30.22
Biomphalysin 10	46.24	45.52	44.98	45.26	45.65	46.14	43.91	45.7	40.93	-	59.41	58.46	56.18	58.64	60.91	61.26	61.78	58.12	54.37	46.79	52.33	46.7	48.08	27.74
Biomphalysin 11	46.81	46.1	45.74	45.74	46.24	44.64	44.68	45.12	34.88	47.71	-	75.62	73.07	75.22	75.8	74.56	74.69	70.77	61.02	54.02	58.19	52.1	52.81	30.07
Biomphalysin 12	45.2	44.66	43.95	43.42	43.88	42.45	43.24	43.11	36.25	46.74	63.13	-	70.67	73.45	73.24	73.42	73.63	69.01	57.32	49.65	59.76	54.12	53.86	28.85
Biomphalysin 13	45.44	44.54	44.72	44.36	43.94	42.86	42.58	43.71	36.05	46.5	65.44	63.67	-	88.26	75.99	76.17	74.44	69.59	59.04	52.9	57.22	50.6	53.07	26.36
Biomphalysin 14	46.11	45.23	45.23	45.58	45.18	43.39	43.64	44.05	35.96	46.28	64.64	62.72	87.59	-	79.26	79.43	78.07	74	61.52	54.66	60.77	53.6	56.51	29.82
Biomphalysin 15	47.42	45.65	45.29	44.94	45.6	44.64	45.47	45.65	36.07	50.35	64.41	62.17	68.37	67.71	-	93.23	78.37	73.02	63.65	53.6	61.54	52.81	54.58	27.72
Biomphalysin 16	47.42	46.18	45.83	45.29	45.24	44.29	45.47	45.65	36.25	50.18	63.02	63.22	68.19	68.4	90.99	-	78.72	72.66	64.18	54.48	61.89	52.28	55.11	27.54
Biomphalysin 17	47.17	46.11	45.58	46.11	45.36	43.57	43.29	45.12	37.75	48.76	62.39	61.5	66.61	66.84	69.97	69.97	-	71.81	63.3	54.13	61.3	54.13	55.63	29.12
Biomphalysin 18	42.68	41.62	41.62	42.08	41.35	40.82	41.45	41.95	34.7	45.15	59.1	56.45	59.97	59.93	59.38	59.2	58.89	-	61.13	51.31	59.34	49.91	52.98	28.25
Biomphalysin 19	37.88	36.64	37.17	37.7	36.67	35.65	36.46	35.7	32.33	40.14	45.64	43.33	45.5	45.3	47.04	47.04	46.34	45.3	-	69.03	63.91	48.76	49.03	27.77
Biomphalysin 20	33.09	32.19	31.83	32.91	31.81	31.69	30.74	30.31	29.8	33.76	41.68	38.38	39.86	40.79	40.14	41.4	39.89	38.82	60.68	-	53.05	43.39	43.56	25.92
Biomphalysin 21	35.82	34.4	33.98	33.87	34.05	33.57	33.69	32.74	31.21	37.01	44.15	46.4	46.82	47.29	46.07	47.29	46.25	44.33	50.26	41	-	49.83	49.39	27.48
Biomphalysin 22	36.59	36.77	35.7	34.99	35.91	34.53	34.99	32.98	29.21	34.29	38	39.58	40.78	40.98	39.82	38.95	41.16	38.88	34.73	31.31	36.01	-	55.16	23.64
Biomphalysin 23	34.55	34.55	34.91	34.91	34.62	35.1	34.91	34.48	28.65	34.48	41.22	42.24	43.38	44.44	43.29	43.29	42.83	39.25	37.14	31.8	39	40.29	-	26.64
		Protein sequence identity score
		Protein sequence similarity score
